# Supplementary material
Source: PubMed Central journal article supplement (PMC8260025)
Supplement: NIHMS1718610-supplement-Supplemental_Table_S1.pdf [file NIHMS1718610-supplement-Supplemental_Table_S1.pdf]

## Supplemental Table S1

## AMH Regulated Genes

Genes that are present in at least 1 of 2 conditions, have greater than 100 expression signal in at least 1 of 2 conditions, have a 2 fold change from control to at least one treatment and are significantly different in at least 1 of 2 conditions. The microarray raw signal is presented for control and AMH.

\*\* Bold genes have a higher expression with MIS treatment when compared to control

### Apoptosis

| Common           | Control    | AMH        | Genbank         | Description                                          |
|------------------|------------|------------|-----------------|------------------------------------------------------|
| <b>Dapk1</b>     | <b>142</b> | <b>399</b> | <b>AA818353</b> | <b>death associated protein kinase 1 (predicted)</b> |
| <b>Ddx42</b>     | <b>91</b>  | <b>192</b> | <b>BM390256</b> | <b>DEAD (Asp-Glu-Ala-Asp) box polypeptide 42</b>     |
| <i>Birc5</i>     | 245        | 58         | NM_022274       | baculoviral IAP repeat-containing 5 (survivin)       |
| <i>Cbl27</i>     | 118        | 55         | AF275151        | androgen receptor-related apoptosis-associated       |
| <i>Emp2</i>      | 220        | 63         | BE112998        | epithelial membrane protein 2                        |
| <i>Ddx24</i>     | 763        | 66         | AW252511        | DEAD (Asp-Glu-Ala-Asp) box polypeptide 24            |
| <i>Ddx3x</i>     | 225        | 77         | BF391513        | DEAD (Asp-Glu-Ala-Asp) box polypeptide 3, X-I        |
| <i>Dhx36</i>     | 187        | 17         | BF404389        | DEAH (Asp-Glu-Ala-His) box polypeptide 36            |
| <i>LOC290671</i> | 740        | 188        | BM390197        | similar to novel cell death-regulatory protein       |

### Cell Cycle

| Common         | Control | AMH | Genbank  | Description                                      |
|----------------|---------|-----|----------|--------------------------------------------------|
| <i>Trp53rk</i> | 305     | 86  | AI711481 | TP53 regulating kinase (predicted) /// TP53      |
|                | 267     | 51  | AA945153 | Similar to zinc finger, HIT domain containing 1; |

### Cytoskeleton/ECM

| Common           | Control    | AMH         | Genbank         | Description                                            |
|------------------|------------|-------------|-----------------|--------------------------------------------------------|
| <b>Eva</b>       | <b>164</b> | <b>275</b>  | <b>BI282616</b> | <b>epithelial V-like antigen (predicted)</b>           |
| <b>Pip2</b>      | <b>561</b> | <b>1178</b> | <b>BM385031</b> | <b>proteolipid protein 2</b>                           |
| <i>Lmna</i>      | 145        | 50          | NM_021755       | lamin A                                                |
| <i>Mapre1</i>    | 326        | 49          | U75920          | microtubule-associated protein, RP/EB family           |
| <i>LOC286890</i> | 429        | 71          | BI295970        | tropomyosin isoform 6                                  |
| <i>LOC286890</i> | 525        | 73          | BI295970        | tropomyosin isoform 6                                  |
| <i>MPL3</i>      | 234        | 57          | AI233190        | microtubule-associated proteins 1A/1B light chain 3    |
| <i>Tpm1</i>      | 234        | 54          | AF372216        | tropomyosin 1, alpha                                   |
| <i>Pfn2</i>      | 213        | 74          | AF228737        | profilin II                                            |
| <i>LOC286890</i> | 389        | 83          | AF053361        | tropomyosin isoform 6                                  |
| <i>Tekt1</i>     | 208        | 78          | NM_053508       | tektin 1                                               |
| <i>Actn1</i>     | 296        | 77          | NM_031005       | actinin, alpha 1                                       |
| <i>Adrm1</i>     | 171        | 61          | NM_031708       | adhesion regulating molecule 1                         |
| <i>Cfl1</i>      | 1901       | 426         | BG666614        | cofilin 1                                              |
| <i>Coro1b</i>    | 346        | 142         | NM_019222       | coronin, actin-binding protein, 1B                     |
| <i>Obrgrp</i>    | 103        | 31          | NM_020099       | synonym: Ob-Rgrp; Rattus norvegicus OB-receptor        |
| <i>Col1a1</i>    | 3847       | 488         | BI285575        | collagen, type 1, alpha 1                              |
| <i>LOC304447</i> | 2156       | 263         | BI285502        | similar to myosin, light polypeptide 6, alkali, smooth |
| <i>Actr1a</i>    | 146        | 51          | BI294346        | ARP1 actin-related protein 1 homolog A (yeast)         |
| <i>Arpc2</i>     | 742        | 178         | AI070323        | actin related protein 2/3 complex, subunit 2           |
| <i>Coro1c</i>    | 211        | 88          | BE120171        | coronin, actin binding protein 1C (predicted)          |
| <i>Aplp2</i>     | 817        | 222         | M31322          | amyloid beta (A4) precursor-like protein 2             |
| <i>Mesdc2</i>    | 145        | 33          | AI013798        | mesoderm development candidate 2 (predicted)           |
| <i>Myr2</i>      | 101        | 40          | NM_023092       | unconventional myosin Myr2 I heavy chain               |
| <i>Rdx</i>       | 390        | 111         | BI297296        | radixin                                                |
| <i>Rdx</i>       | 143        | 18          | BF565167        | radixin                                                |
| <i>SC2</i>       | 777        | 169         | BI282960        | synaptic glycoprotein SC2                              |
| <i>Spnb2</i>     | 170        | 84          | BF392456        | spectrin beta 2                                        |

|               |      |     |           |                   |
|---------------|------|-----|-----------|-------------------|
| <i>Spnb2</i>  | 267  | 102 | BF559566  | Spectrin beta 2   |
| <i>Tmsb10</i> | 1609 | 89  | NM_021261 | thymosin, beta 10 |

#### Development

| Common              | Control   | AMH        | Genbank         | Description                                                                       |
|---------------------|-----------|------------|-----------------|-----------------------------------------------------------------------------------|
| <b><i>Lgl1</i></b>  | <b>79</b> | <b>206</b> | <b>AI175861</b> | <b>late gestation lung protein 1</b>                                              |
| <b><i>Plac9</i></b> | <b>62</b> | <b>69</b>  | <b>BI276313</b> | <b>placenta-specific 9 (predicted)</b>                                            |
| <i>IAG2</i>         | 339       | 100        | NM_053946       | implantation-associated protein                                                   |
| <i>Dscr1</i>        | 128       | 47         | AI170193        | Down syndrome critical region homolog 1 (human)                                   |
| <i>Sp17</i>         | 221       | 49         | NM_053482       | sperm autoantigenic protein 17                                                    |
| <i>Cops7a</i>       | 283       | 72         | BE110772        | COP9 (constitutive photomorphogenic) homolog, discs, large homolog 1 (Drosophila) |
| <i>Dlgh1</i>        | 105       | 36         | NM_012788       | muscleblind-like 2 (predicted)                                                    |
| <i>Mbnl2</i>        | 110       | 5          | AI180361        | myotrophin                                                                        |
| <i>Mtpn</i>         | 391       | 91         | BG667380        | estrous-specific protein, 250 kDa                                                 |
| <i>LOC246270</i>    | 677       | 108        | AI105044        | similar to hematopoietic progenitor protein                                       |
| <i>LOC500727</i>    | 111       | 20         | BI293502        | Sjogren's syndrome nuclear autoantigen 1                                          |
| ---                 | 472       | 198        | BF281133        | Sprouty protein with EVH-1 domain 1, related                                      |
| ---                 | 205       | 48         | BF388903        | DiGeorge syndrome critical region gene 14                                         |
| ---                 | 113       | 57         | BM386296        |                                                                                   |

#### Electron Transport

| Common               | Control    | AMH         | Genbank          | Description                                             |
|----------------------|------------|-------------|------------------|---------------------------------------------------------|
| <b><i>Cyp51</i></b>  | <b>574</b> | <b>929</b>  | <b>NM_012941</b> | <b>cytochrome P450, subfamily 51</b>                    |
| <b><i>Fdx1</i></b>   | <b>508</b> | <b>1081</b> | <b>NM_017126</b> | <b>ferredoxin 1</b>                                     |
| <b><i>Hpgd</i></b>   | <b>30</b>  | <b>91</b>   | <b>AA848820</b>  | <b>NAD-dependent 15-hydroxyprostaglandin</b>            |
| <b><i>Cyp2u1</i></b> | <b>91</b>  | <b>207</b>  | <b>BF392959</b>  | <b>cytochrome P450, family 2, subfamily u,</b>          |
| <b><i>Mto1</i></b>   | <b>83</b>  | <b>200</b>  | <b>BM386301</b>  | <b>mitochondrial translation optimization 1 homolog</b> |
| <i>Cycs</i>          | 666        | 210         | NM_012839        | cytochrome c, somatic                                   |
| <i>Cyba</i>          | 363        | 125         | AI232788         | cytochrome b558 alpha-subunit                           |
| <i>Cox7b</i>         | 2444       | 679         | AA866477         | cytochrome c oxidase subunit VIIIb                      |
| <i>Ndufa5</i>        | 247        | 55          | NM_012985        | NADH dehydrogenase (ubiquinone) 1 alpha                 |

#### Growth Factor/Cytokines/Chemokines

| Common              | Control    | AMH        | Genbank         | Description                                        |
|---------------------|------------|------------|-----------------|----------------------------------------------------|
| <b><i>Gdf1</i></b>  | <b>46</b>  | <b>119</b> | <b>BI289525</b> | <b>growth differentiation factor 1 (predicted)</b> |
| <b><i>Vegf</i></b>  | <b>347</b> | <b>705</b> | <b>AI175732</b> | <b>vascular endothelial growth factor</b>          |
| <b><i>Csf1</i></b>  | <b>176</b> | <b>220</b> | <b>AW535553</b> | <b>colony stimulating factor 1(macrophage)</b>     |
| <b><i>Agpt2</i></b> | <b>64</b>  | <b>181</b> | <b>BI275292</b> | <b>angiopoietin-2</b>                              |
| <i>Slpa</i>         | 261        | 78         | AF180526        | septin-like protein                                |
| <i>Fgfr1</i>        | 241        | 68         | S54008          | Fibroblast growth factor receptor 1                |
| <i>Bmp15</i>        | 131        | 22         | NM_021670       | bone morphogenetic protein 15                      |
| <i>Emp3</i>         | 857        | 366        | NM_030847       | epithelial membrane protein 3                      |
| <i>Gdf9</i>         | 1729       | 386        | NM_021672       | growth differentiation factor 9                    |
| <i>Ccl21b</i>       | 201        | 41         | BI282920        | chemokine (C-C motif) ligand 21b (serine)          |
| <i>Ccl7</i>         | 250        | 100        | BF419899        | chemokine (C-C motif) ligand 7                     |
| <i>Crim1</i>        | 174        | 67         | BI289620        | cysteine-rich motor neuron 1 (predicted)           |
| <i>Mif</i>          | 1630       | 153        | NM_031051       | macrophage migration inhibitory factor             |
| <i>Fstl</i>         | 370        | 76         | NM_024369       | follicle-stimulating factor-like                   |

#### Golgi

| Common              | Control   | AMH        | Genbank         | Description                          |
|---------------------|-----------|------------|-----------------|--------------------------------------|
| <b><i>Ttgn1</i></b> | <b>77</b> | <b>319</b> | <b>AW917192</b> | <b>trans-golgi network protein 1</b> |

|                      |           |            |                 |                                                                |
|----------------------|-----------|------------|-----------------|----------------------------------------------------------------|
| <b>Hs3st1</b>        | <b>96</b> | <b>130</b> | <b>AF177430</b> | <b>heparan sulfate (glucosamine) 3-O-</b>                      |
| <i>Rnp24</i>         | 438       | 121        | NM_031722       | coated vesicle membrane protein                                |
| <i>Gmx33</i>         | 152       | 59         | NM_023977       | trans-Golgi protein GMx33                                      |
| <i>Arf5</i>          | 264       | 90         | NM_024149       | ADP-ribosylation factor 5                                      |
| <i>Bet1l</i>         | 127       | 17         | NM_019368       | blocked early in transport 1 homolog ( <i>S. cerevisiae</i> )- |
| <i>Mclc</i>          | 1174      | 398        | AB052921        | Mid-1-related chloride channel 1                               |
| <i>Ap1s1</i>         | 295       | 74         | AA955775        | adaptor protein complex AP-1, sigma 1 (predicted)              |
| <i>Copz1</i>         | 404       | 47         | BF406339        | coatamer protein complex, subunit zeta 1                       |
| <i>Stx5a</i>         | 251       | 58         | BI296446        | syntaxin 5a                                                    |
| <i>Trappc1</i>       | 456       | 120        | BE112892        | trafficking protein particle complex 1 (predicted)             |
| <i>Lgals5</i>        | 306       | 87         | NM_012976       | lectin, galactose binding, soluble 5                           |
| <i>Lgals9</i>        | 157       | 27         | U72741          | lectin, galactose binding, soluble 9                           |
| <i>B3gnt7</i>        | 101       | 33         | BE098162        | UDP-GlcNAc:betaGal beta-1,3-N-                                 |
| <i>LOC502017 ///</i> | 388       | 141        | AI179780        | similar to Dolichol-phosphate mannosyltransferase              |
| <i>RGD1307160</i>    | 204       | 92         | BF283388        | similar to golgi-specific brefeldin A-resistance               |

### Immune Response

| Common              | Control    | AMH        | Genbank          | Description                                   |
|---------------------|------------|------------|------------------|-----------------------------------------------|
| <b><i>Bcl10</i></b> | <b>360</b> | <b>683</b> | <b>NM_031328</b> | <b>B-cell CLL/lymphoma 10</b>                 |
| <b><i>Cd68</i></b>  | <b>59</b>  | <b>139</b> | <b>AI177761</b>  | <b>CD68 antigen (predicted)</b>               |
| <i>Ly6b</i>         | 149        | 44         | NM_020103        | Ly6-C antigen gene                            |
| <i>Scye1</i>        | 235        | 42         | AI454911         | endothelial monocyte activating polypeptide 2 |
| ---                 | 114        | 32         | AW534002         | B-cell CLL/lymphoma 7A (predicted)            |

### Metabolism / Transport

| Common                  | Control     | AMH         | Genbank          | Description                                             |
|-------------------------|-------------|-------------|------------------|---------------------------------------------------------|
| <b><i>Ptgis</i></b>     | <b>259</b>  | <b>497</b>  | <b>NM_031557</b> | <b>prostaglandin I2 synthase</b>                        |
|                         | <b>63</b>   | <b>80</b>   | <b>AI639241</b>  | <b>Similar to Ubiquitin carboxyl-terminal hydrolase</b> |
| <b><i>Asns</i></b>      | <b>86</b>   | <b>246</b>  | <b>U07202</b>    | <b>asparagine synthetase</b>                            |
| <b><i>Bach</i></b>      | <b>138</b>  | <b>213</b>  | <b>D88891</b>    | <b>brain acyl-CoA hydrolase</b>                         |
| <b><i>Bcat1</i></b>     | <b>117</b>  | <b>292</b>  | <b>AI102790</b>  | <b>branched chain aminotransferase 1, cytosolic</b>     |
| <b><i>Gpx2</i></b>      | <b>158</b>  | <b>482</b>  | <b>AA800587</b>  | <b>glutathione peroxidase 2</b>                         |
| <b><i>Hsd3b1</i></b>    | <b>225</b>  | <b>1076</b> | <b>NM_017265</b> | <b>hydroxy-delta-5-steroid dehydrogenase, 3 beta-</b>   |
| <b><i>Kpna1</i></b>     | <b>103</b>  | <b>155</b>  | <b>AI101822</b>  | <b>karyopherin alpha 1 (importin alpha 5)</b>           |
| <b><i>Comtd1</i></b>    | <b>144</b>  | <b>392</b>  | <b>AW251225</b>  | <b>catechol-O-methyltransferase domain</b>              |
| <b><i>Kcne2</i></b>     | <b>146</b>  | <b>355</b>  | <b>AW920063</b>  | <b>potassium voltage-gated channel, Isk-related</b>     |
| <b><i>Nmt2</i></b>      | <b>55</b>   | <b>412</b>  | <b>AA900781</b>  | <b>N-myristoyltransferase 2</b>                         |
| <b><i>Nid67</i></b>     | <b>144</b>  | <b>298</b>  | <b>AF313411</b>  | <b>putative small membrane protein NID67</b>            |
| <b><i>Pex13</i></b>     | <b>820</b>  | <b>1143</b> | <b>AI012951</b>  | <b>peroxisomal biogenesis factor 13 (predicted)</b>     |
| <b><i>Pfkip</i></b>     | <b>212</b>  | <b>513</b>  | <b>BM389769</b>  | <b>Phosphofructokinase, platelet</b>                    |
| <b><i>Phax</i></b>      | <b>1010</b> | <b>1255</b> | <b>AI044239</b>  | <b>phosphorylated adaptor for RNA export</b>            |
| <b><i>Scyl1</i></b>     | <b>267</b>  | <b>438</b>  | <b>AI180441</b>  | <b>SCY1-like 1 (<i>S. cerevisiae</i>) (predicted)</b>   |
| <b><i>Sec6</i></b>      | <b>296</b>  | <b>400</b>  | <b>AA851443</b>  | <b>RSec6 protein</b>                                    |
| <b><i>Slc39a1</i></b>   | <b>97</b>   | <b>109</b>  | <b>NM_133315</b> | <b>solute carrier family 39 (iron-regulated</b>         |
| <b><i>Star</i></b>      | <b>55</b>   | <b>118</b>  | <b>AB006007</b>  | <b>steroidogenic acute regulatory protein</b>           |
| <b><i>Star</i></b>      | <b>85</b>   | <b>235</b>  | <b>NM_031558</b> | <b>steroidogenic acute regulatory protein</b>           |
| <b><i>Dpysl2</i></b>    | <b>195</b>  | <b>449</b>  | <b>BE118404</b>  | <b>dihydropyrimidinase-like 2</b>                       |
| <b><i>Hbb</i></b>       | 414         | 47          | X05080           | hemoglobin beta chain complex                           |
| <b><i>Sord</i></b>      | 267         | 80          | NM_017052        | sorbitol dehydrogenase                                  |
| <b><i>Ephx1</i></b>     | 161         | 63          | NM_012844        | epoxide hydrolase 1                                     |
| <b><i>Prps1</i></b>     | 358         | 93          | M29392           | phosphoribosyl pyrophosphate synthetase 1               |
| <b><i>Glns</i></b>      | 123         | 39          | BI296610         | glutamine synthetase 1                                  |
| <b><i>LOC191574</i></b> | 173         | 33          | M61937           | 3-alpha-hydroxysteroid dehydrogenase                    |
| <b><i>Adk</i></b>       | 242         | 86          | U90340           | adenosine kinase                                        |

|                  |      |     |           |                                                             |
|------------------|------|-----|-----------|-------------------------------------------------------------|
| <i>Vdac1</i>     | 164  | 42  | AF268467  | voltage-dependent anion channel 1                           |
| <i>Apoe</i>      | 2746 | 972 | J02582    | Rat apolipoprotein E gene                                   |
| <i>Gtrap3-18</i> | 305  | 70  | NM_023972 | glutamate transporter EAAC1 interacting protein             |
|                  | 251  | 102 | BF561717  | Similar to pyruvate dehydrogenase (LOC306640),              |
| <i>Rbp1</i>      | 1288 | 487 | NM_012733 | retinol binding protein 1                                   |
| <i>Ap2s1</i>     | 560  | 92  | NM_022952 | clathrin-associated protein 17                              |
| <i>Atp5g1</i>    | 931  | 181 | NM_017311 | ATP synthase, H <sup>+</sup> transporting, mitochondrial F0 |
| <i>Atp5g2</i>    | 1779 | 210 | AI170772  | ATP synthase, H <sup>+</sup> transporting, mitochondrial F0 |
| <i>Atp5jd</i>    | 1752 | 448 | NM_019383 | ATP synthase subunit d                                      |
| <i>Atp6s1</i>    | 441  | 206 | NM_031785 | ATPase, H <sup>+</sup> transporting, lysosomal (vacuolar    |
| <i>Ckb</i>       | 857  | 197 | M14400    | creatine kinase, brain                                      |
| <i>Coq7</i>      | 280  | 136 | U46149    | demethyl-Q 7                                                |
| <i>Ddah1</i>     | 553  | 186 | NM_022297 | Rattus norvegicus dimethylarginine                          |
| <i>Ech1</i>      | 920  | 299 | NM_022594 | enoyl coenzyme A hydratase 1                                |
| <i>Ensa</i>      | 385  | 125 | BI289922  | endosulfine alpha                                           |
| <i>Ensa</i>      | 168  | 38  | NM_021842 | endosulfine alpha                                           |
| <i>Fen1</i>      | 215  | 122 | NM_053430 | Flap structure-specific endonuclease 1                      |
| <i>Fkbp1a</i>    | 316  | 99  | NM_053308 | FK506-binding protein 1a                                    |
| <i>Fkbp4</i>     | 465  | 219 | BE113154  | FK506 binding protein 4 (59 kDa)                            |
| <i>Fxyd1</i>     | 214  | 52  | NM_031648 | FXYD domain-containing ion transport regulator 1            |
| <i>Fyn</i>       | 246  | 51  | NM_012755 | fyn proto-oncogene                                          |
| <i>Gaa</i>       | 140  | 43  | BF404337  | glucosidase, alpha; acid (Pompe disease, glycogen           |
| <i>Gb3</i>       | 196  | 62  | NM_022240 | Gb3 synthase                                                |
| <i>Gmpr</i>      | 299  | 99  | NM_057188 | guanosine monophosphate reductase                           |
| <i>Gpx4</i>      | 1068 | 356 | NM_017165 | glutathione peroxidase 4                                    |
| <i>Gstm3</i>     | 180  | 72  | NM_031154 | glutathione S-transferase, mu type 3 (Yb3)                  |
| <i>Gstp2</i>     | 2147 | 789 | X02904    | glutathione S-transferase, pi 2                             |
| <i>Hba1</i>      | 2691 | 223 | AI179404  | Similar to hemoglobin alpha chain (LOC367986),              |
| <i>Hba1</i>      | 2893 | 233 | AI179404  | Similar to hemoglobin alpha chain (LOC367986),              |
| <i>Hba1</i>      | 1282 | 276 | AI577319  | hemoglobin, alpha 1                                         |
| <i>Hbb</i>       | 1264 | 72  | NM_033234 | Rattus norvegicus hemoglobin beta chain complex             |
| <i>Hsd17b10</i>  | 982  | 260 | NM_031682 | hydroxysteroid (17-beta) dehydrogenase 10                   |
| <i>Hspbp1</i>    | 169  | 49  | AF187860  | hsp70-interacting protein                                   |
| <i>Idi1</i>      | 578  | 157 | NM_053539 | isopentenyl-diphosphate delta isomerase                     |
| <i>Kcne2</i>     | 105  | 47  | NM_133603 | potassium voltage-gated channel, Isk-related                |
| <i>KRP2</i>      | 107  | 19  | NM_134472 | Rattus norvegicus kinesin-related protein 2 (KRP2)          |
| <i>Laptm4a</i>   | 2401 | 646 | AW525776  | lysosomal-associated protein transmembrane 4                |
| <i>LOC191574</i> | 154  | 49  | BF545626  | 3-alpha-hydroxysteroid dehydrogenase                        |
| <i>Acp6</i>      | 260  | 33  | BF555852  | acid phosphatase 6, lysophosphatidic (predicted)            |
| <i>Arih2</i>     | 114  | 34  | AW918630  | ariadne homolog 2 (Drosophila) (predicted)                  |
| <i>Arl2bp</i>    | 111  | 52  | BF567478  | ADP-ribosylation factor-like 2 binding protein              |
| <i>Arl6ip4</i>   | 158  | 78  | BE101624  | ADP-ribosylation factor-like 6 interacting protein 4        |
| <i>Asna1</i>     | 262  | 111 | AI406558  | arsA arsenite transporter, ATP-binding, homolog 1           |
| <i>Atp6v0a2</i>  | 200  | 60  | BE110564  | ATPase, H <sup>+</sup> transporting, lysosomal V0 subunit a |
| <i>Dtymk</i>     | 449  | 169 | AW141143  | deoxythymidylate kinase (predicted)                         |
| <i>Exosc5</i>    | 164  | 63  | AA943578  | exosome component 5 (predicted)                             |
| <i>G2an</i>      | 175  | 69  | BM389337  | alpha glucosidase 2, alpha neutral subunit                  |
| <i>Galnt2</i>    | 291  | 72  | BE111638  | UDP-N-acetyl-alpha-D-galactosamine:polypeptide              |
| <i>Gars</i>      | 110  | 41  | AW507352  | glycyl-tRNA synthetase (predicted) /// similar to           |
| <i>Ipo7</i>      | 421  | 130 | BM390183  | importin 7 (predicted)                                      |
| <i>Kpnb3</i>     | 691  | 336 | BI280339  | karyopherin (importin) beta 3 (predicted)                   |
| <i>Mgl</i>       | 107  | 25  | NM_022393 | macrophage galactose N-acetyl-galactosamine                 |
| <i>Mgst3</i>     | 293  | 109 | AA892234  | mitochondrial glutathione S-transferase 3 (predicted)       |
| <i>Mrpl35</i>    | 363  | 144 | BF408394  | mitochondrial ribosomal protein L35 (predicted)             |
| <i>Mrps18c</i>   | 145  | 35  | AI071722  | mitochondrial ribosomal protein S18C (predicted)            |
| <i>Mrps23</i>    | 570  | 201 | AI411153  | mitochondrial ribosomal protein S23 (predicted)             |

|                    |      |     |           |                                                     |
|--------------------|------|-----|-----------|-----------------------------------------------------|
| <i>Ncbp2</i>       | 238  | 79  | AI136699  | nuclear cap binding protein subunit 2 (predicted)   |
| <i>Nedd4a</i>      | 650  | 105 | BI286685  | neural precursor cell expressed, developmentally    |
| <i>Nusap1</i>      | 668  | 267 | AI711233  | nucleolar and spindle associated protein 1          |
| <i>Orp150</i>      | 180  | 58  | BI282904  | oxygen regulated protein (150kD)                    |
| <i>Pafah1b3</i>    | 391  | 142 | NM_053654 | platelet-activating factor acetylhydrolase, isoform |
| <i>Pex19</i>       | 113  | 42  | AW141617  | peroxisome biogenesis factor 19 (predicted)         |
| <i>Pfkm</i>        | 103  | 19  | BI291434  | phosphofructokinase, muscle                         |
| <i>Phex</i>        | 162  | 61  | NM_013004 | phosphate regulating gene with homologies           |
| <i>Prps2</i>       | 113  | 51  | M17259    | phosphoribosyl pyrophosphate synthetase 2           |
| <i>Qdpr</i>        | 486  | 155 | NM_022390 | quinoid dihydropteridine reductase                  |
| <i>Rae1</i>        | 113  | 28  | BF419215  | RAE1 RNA export 1 homolog ( <i>S. pombe</i> )       |
| <i>Raly</i>        | 350  | 147 | BM389226  | hnRNP-associated with lethal yellow (predicted)     |
| <i>Sec22a</i>      | 232  | 40  | NM_057147 | SEC22 vesicle trafficking protein-like 2            |
| <i>Sec3l1</i>      | 124  | 28  | BF404853  | SEC3-like 1 ( <i>S. cerevisiae</i> ) (predicted)    |
| <i>Sepw1</i>       | 153  | 17  | NM_013027 | selenoprotein W, muscle 1                           |
| <i>Slc4a2</i>      | 146  | 45  | NM_017048 | solute carrier family 4, member 2                   |
| <i>Thop1</i>       | 209  | 111 | M61142    | thimet oligopeptidase 1                             |
| <i>TOM40</i>       | 163  | 71  | AA944181  | Similar to Probable mitochondrial import receptor   |
| <i>Treh</i>        | 464  | 139 | AA850780  | trehalase                                           |
| <i>Ttc1</i>        | 265  | 30  | BM387763  | tetratricopeptide repeat domain 1                   |
| <i>Ttc11</i>       | 404  | 122 | AA892378  | tetratricopeptide repeat domain 11 (predicted)      |
| <i>Ung</i>         | 695  | 345 | AA848420  | uracil-DNA glycosylase (predicted)                  |
| <i>Wbp4</i>        | 177  | 32  | BG663444  | WW domain binding protein 4 (formin binding         |
| <i>Z49858</i>      | 272  | 59  | NM_022533 | plasmolipin                                         |
| <i>Arf1</i>        | 899  | 175 | NM_022518 | ADP-ribosylation factor 1                           |
| <i>Prps1</i>       | 358  | 93  | M29392    | phosphoribosyl pyrophosphate synthetase 1           |
| <i>LOC499528</i>   | 743  | 53  | BF403931  | similar to uracil-DNA glycosylase 2                 |
| <i>LOC502642</i>   | 1333 | 218 | BI285703  | similar to Selenoprotein H                          |
| <i>RGD:1303221</i> | 377  | 135 | BI291292  | peptidylprolyl isomerase C                          |
| <i>RGD:1303295</i> | 1964 | 315 | BG378926  | S100 calcium binding protein A11 (calizzarin)       |
| <i>RGD1306617</i>  | 132  | 23  | AW916358  | similar to Serine palmitoyltransferase 1            |

### Proteolysis

| Common           | Control    | AMH         | Genbank         | Description                                    |
|------------------|------------|-------------|-----------------|------------------------------------------------|
| <i>Ubc7</i>      | 406.3      | 108.9       | AF099093        | ubiquitin-conjugating enzyme UBC7              |
| <b>Ctsc</b>      | <b>410</b> | <b>1354</b> | <b>AW920064</b> | <b>Cathepsin C</b>                             |
| <b>Senp5_</b>    | <b>118</b> | <b>270</b>  | <b>BE105606</b> | cathepsin D                                    |
| <i>Ctsd</i>      | 692        | 264         | NM_134334       | membrane-bound transcription factor protease,  |
| <i>Mbtps1</i>    | 770        | 352         | NM_053569       | proteasome (prosome, macropain) subunit,       |
| <i>Psm3</i>      | 1700       | 604         | NM_017280       | proteasome (prosome, macropain) subunit, beta  |
| <i>Psm1</i>      | 1713       | 508         | NM_053590       | proteasome (prosome, macropain) subunit, beta  |
| <i>Psm9</i>      | 337        | 92          | AI599350        | <b>SUMO/sentrin specific protease 5 ///</b>    |
| <i>Ube2g2</i>    | 175        | 75          | BI282191        | ubiquitin-conjugating enzyme E2G 2 (predicted) |
| <i>Ube2n</i>     | 1277       | 300         | BI294702        | ubiquitin-conjugating enzyme E2N               |
| <i>Uchl1</i>     | 1986       | 261         | NM_017237       | ubiquitin carboxy-terminal hydrolase L1        |
| <i>Ufd1l</i>     | 171        | 62          | NM_053418       | ubiquitin fusion degradation 1-like            |
| <i>LOC360990</i> | 110        | 57          | BF394201        | similar to ubiquitin specific protease 34      |
| <i>LOC499945</i> | 704        | 153         | AW142658        | similar to ubiquitin-conjugating enzyme E2     |
| ---              | 255        | 85          | BI288780        | Ubiquitin specific protease 7 (herpes virus-   |

### Receptors

| Common         | Control   | AMH        | Genbank          | Description                                   |
|----------------|-----------|------------|------------------|-----------------------------------------------|
| <b>Cd36l2</b>  | <b>83</b> | <b>332</b> | <b>NM_054001</b> | <b>CD36 antigen (collagen type I receptor</b> |
| <b>Il12rb2</b> | <b>37</b> | <b>50</b>  | <b>AW526895</b>  | <b>Interleukin 12 receptor, beta 2</b>        |

|               |      |     |           |                                                 |
|---------------|------|-----|-----------|-------------------------------------------------|
| <i>Vldlr</i>  | 233  | 520 | AA849857  | very low density lipoprotein receptor           |
| ---           | 23   | 68  | AW253907  | Transmembrane 9 superfamily protein member 4    |
| <i>Acvr1</i>  | 144  | 68  | BM389711  | activin type I receptor                         |
| <i>Fgfr1</i>  | 241  | 68  | S54008    | Fibroblast growth factor receptor 1             |
| <i>Grin1a</i> | 255  | 57  | BG664035  | glutamate receptor, ionotropic                  |
| <i>Lamr1</i>  | 4982 | 697 | NM_017138 | laminin receptor 1 (67kD, ribosomal protein SA) |
| <i>Nr1h2</i>  | 328  | 109 | AI169222  | nuclear receptor subfamily 1, group H, member 2 |
| <i>Pmpcb</i>  | 570  | 163 | NM_022395 | mitochondrial processing peptidase beta         |
| <i>Scarb1</i> | 125  | 37  | AF071495  | scavenger receptor class B, member 1            |
| <i>Srprb</i>  | 217  | 64  | BF407425  | signal recognition particle receptor, B subunit |
| <i>Fgfr1</i>  | 241  | 68  | S54008    | Fibroblast growth factor receptor 1             |
| ---           | 178  | 89  | BI275978  | Transmembrane 9 superfamily protein member      |

### Signaling

| Common                   | Control    | AMH         | Genbank          | Description                                                  |
|--------------------------|------------|-------------|------------------|--------------------------------------------------------------|
| <b><i>RGD1308120</i></b> | <b>552</b> | <b>1317</b> | <b>BI274192</b>  | <b>similar to toll-associated serine protease</b>            |
| <b><i>LOC502916</i></b>  | <b>72</b>  | <b>238</b>  | <b>AI170076</b>  | <b>similar to RAS-like, estrogen-regulated</b>               |
| <b><i>LOC499956</i></b>  | <b>104</b> | <b>270</b>  | <b>BG372998</b>  | <b>similar to Uridine-cytidine kinase 1-like 1</b>           |
| <b><i>Ptdsr</i></b>      | <b>260</b> | <b>352</b>  | <b>AI232697</b>  | <b>phosphatidylserine receptor (predicted)</b>               |
| <b><i>Riok2</i></b>      | <b>69</b>  | <b>165</b>  | <b>BG371773</b>  | <b>RIO kinase 2 (yeast) (predicted)</b>                      |
| <b><i>Rasd1</i></b>      | <b>328</b> | <b>854</b>  | <b>AF239157</b>  | <b>RAS, dexamethasone-induced 1</b>                          |
| <b><i>Raf1</i></b>       | <b>88</b>  | <b>137</b>  | <b>BF405684</b>  | <b>murine leukemia viral (v-raf-1) oncogene</b>              |
| <b><i>Csnk1a1</i></b>    | <b>277</b> | <b>645</b>  | <b>AI176867</b>  | <b>casein kinase 1, alpha 1</b>                              |
| <b><i>Itga6</i></b>      | <b>50</b>  | <b>115</b>  | <b>AI137931</b>  | <b>Integrin, alpha 6</b>                                     |
| <b><i>Mrgprb4</i></b>    | <b>56</b>  | <b>144</b>  | <b>BF550033</b>  | <b>MAS-related G protein-coupled receptor,</b>               |
| <b><i>Ndrg2</i></b>      | <b>439</b> | <b>1103</b> | <b>NM_133583</b> | <b>N-myc downstream-regulated gene 2</b>                     |
| <b><i>Snx7</i></b>       | <b>145</b> | <b>339</b>  | <b>AA997003</b>  | <b>sorting nexin 7 (predicted)</b>                           |
| <b><i>Pepp2</i></b>      | <b>211</b> | <b>506</b>  | <b>AI009219</b>  | <b>phosphoinositol 3-phosphate-binding</b>                   |
| <i>RGD1307679</i>        | 140        | 33          | AI501557         | similar to ATP/GTP-binding protein (predicted)               |
| <i>MGC105830</i>         | 206        | 88          | AI711306         | similar to Ras-related protein Rab-1B                        |
| <i>Rgs2</i>              | 221        | 54          | AF321837         | regulator of G-protein signaling protein 2                   |
|                          | 109        | 38          | AA996576         | Similar to RAB5B, member RAS oncogene                        |
| <i>Akt1</i>              | 230        | 65          | NM_033230        | v-akt murine thymoma viral oncogene homolog                  |
| <i>Jak2</i>              | 200        | 85          | NM_031514        | Janus kinase 2                                               |
| <i>Gucy1a3</i>           | 132        | 52          | M57405           | guanylate cyclase 1, soluble, alpha 3                        |
| <i>Arha2</i>             | 260        | 69          | NM_057132        | plysia ras-related homolog A2                                |
| <i>Ppm1a</i>             | 166        | 55          | NM_017038        | protein phosphatase 1A, magnesium                            |
| <i>Ppp2r1a</i>           | 513        | 235         | AA800669         | protein phosphatase 2 (formerly 2A), regulatory              |
| <i>Ppp4c</i>             | 130        | 42          | AA957050         | protein phosphatase 4 (formerly X), catalytic                |
| <i>Pik4cb</i>            | 148        | 81          | NM_031083        | phosphatidylinositol 4-kinase                                |
| <i>Pius</i>              | 865        | 159         | NM_021660        | inositol hexaphosphate kinase 2                              |
| <i>Camk2g</i>            | 274        | 38          | NM_133605        | calcium/calmodulin-dependent protein kinase)                 |
| <i>Csnk1d</i>            | 365        | 119         | L07578           | casein kinase 1, delta                                       |
| <i>Csnk2b</i>            | 1022       | 452         | BF281311         | casein kinase II beta subunit                                |
| <i>Calm3</i>             | 331        | 169         | AI411316         | calmodulin 3                                                 |
| <i>Nvp3</i>              | 142        | 28          | NM_017356        | neural visinin-like Ca <sup>2+</sup> -binding protein type 3 |
| <i>Stip1</i>             | 693        | 188         | BI283691         | stress-induced-phosphoprotein 1                              |
| <i>Arhgap8</i>           | 152        | 55          | AW252517         | Rho GTPase activating protein 8 (predicted)                  |
| <i>Ppp5c</i>             | 127        | 31          | NM_031729        | protein phosphatase 5, catalytic subunit                     |
| <i>Rab11b</i>            | 270        | 34          | D01046           | RAB11B, member RAS oncogene family                           |
| <i>Rgs2</i>              | 221        | 54          | AF321837         | regulator of G-protein signaling protein 2                   |
|                          | 109        | 38          | AA996576         | Similar to RAB5B, member RAS oncogene                        |
| <i>Akt1</i>              | 230        | 65          | NM_033230        | v-akt murine thymoma viral oncogene homolog                  |
| <i>Jak2</i>              | 200        | 85          | NM_031514        | Janus kinase 2                                               |
| <i>Gucy1a3</i>           | 132        | 52          | M57405           | guanylate cyclase 1, soluble, alpha 3                        |

|                    |      |     |           |                                                 |
|--------------------|------|-----|-----------|-------------------------------------------------|
| <i>Arha2</i>       | 260  | 69  | NM_057132 | plysia ras-related homolog A2                   |
| <i>Ppm1a</i>       | 166  | 55  | NM_017038 | protein phosphatase 1A, magnesium               |
| <i>Anp32a</i>      | 232  | 67  | NM_012903 | acidic nuclear phosphoprotein 32 family,        |
| <i>Arpp19</i>      | 180  | 80  | AW918228  | cyclic AMP phosphoprotein, 19 kDa               |
| <i>Arrb2</i>       | 206  | 55  | BF285345  | arrestin, beta 2                                |
| <i>Axin2</i>       | 120  | 25  | NM_024355 | axin2                                           |
| <i>Bambi</i>       | 972  | 356 | AF387513  | BMP and activin membrane-bound inhibitor,       |
| <i>Avpi1</i>       | 139  | 40  | AI010260  | arginine vasopressin-induced 1                  |
| <i>Rhoc</i>        | 328  | 110 | AA891940  | ras homolog gene family, member C               |
| <i>Fkbp8</i>       | 302  | 176 | BI274519  | FK506 binding protein 8 (predicted)             |
| <i>Gkap1</i>       | 284  | 75  | BE112067  | G kinase anchoring protein 1 (predicted)        |
| <i>Il6st</i>       | 156  | 56  | BG663025  | Interleukin 6 signal transducer                 |
| <i>Map3k1</i>      | 954  | 243 | NM_053887 | mitogen activated protein kinase kinase kinase  |
| <i>Map3k3</i>      | 123  | 53  | AA925300  | mitogen activated protein kinase kinase kinase  |
| <i>Mtus1</i>       | 304  | 154 | BF284182  | mitochondrial tumor suppressor 1                |
| <i>Rab13</i>       | 186  | 63  | AW253722  | RAB13                                           |
| <i>Rab3a</i>       | 212  | 87  | BF389910  | RAB3A, member RAS oncogene family               |
| <i>Rab4b</i>       | 101  | 25  | NM_017355 | ras-related GTP-binding protein 4b              |
| <i>Rabac1</i>      | 590  | 103 | NM_031774 | Rab acceptor 1 (prenylated)                     |
| <i>Pld1</i>        | 466  | 167 | AB003171  | phospholipase D1                                |
| <i>Psen2</i>       | 200  | 45  | AB004454  | presenilin-2                                    |
| <i>Rgs19ip1</i>    | 110  | 29  | NM_053341 | regulator of G-protein signaling 19 interacting |
| <i>Ppp5c</i>       | 127  | 31  | NM_031729 | protein phosphatase 5, catalytic subunit        |
| <i>Rab11b</i>      | 270  | 34  | D01046    | RAB11B, member RAS oncogene family              |
|                    | 288  | 84  | S75280    | 70 kda heat shock protein precursor             |
| <i>Ifitm3l</i>     | 3529 | 659 | BI285494  | interferon induced transmembrane protein 3-     |
| <i>RGD:1303075</i> | 1244 | 157 | BI285700  | heat shock 90kDa protein 1, beta                |
| <i>RGD:1303136</i> | 317  | 97  | AI144819  | zinc responsive protein ZD10B /// zinc          |

### Translation

| Common             | Control    | AMH        | Genbank         | Description                                         |
|--------------------|------------|------------|-----------------|-----------------------------------------------------|
| <b><i>Drb1</i></b> | <b>183</b> | <b>302</b> | <b>BI289591</b> | <b>developmentally regulated RNA-binding</b>        |
| <i>Rpl14</i>       | 3602       | 832        | AA874811        | ribosomal protein L14                               |
| <i>Rpl24</i>       | 4144       | 639        | BI297634        | ribosomal protein L24                               |
| <i>Rpl36</i>       | 132        | 24         | AI009003        | ribosomal protein L36                               |
| <i>Rpl36a</i>      | 4997       | 476        | AW142090        | ribosomal protein L36a (predicted)                  |
| <i>Rplm2</i>       | 100        | 24         | AA848353        | Similar to mitochondrial ribosomal protein L37      |
| <i>Rps10</i>       | 4461       | 1095       | NM_031109       | ribosomal protein S10                               |
| <i>Rps24</i>       | 8130       | 1761       | BG375811        | ribosomal protein S24                               |
| <i>Rps9</i>        | 5148       | 1226       | AA799768        | ribosomal protein S9                                |
| <i>Arf1</i>        | 899        | 175        | NM_022518       | ADP-ribosylation factor 1                           |
| <i>Prps1</i>       | 358        | 93         | M29392          | phosphoribosyl pyrophosphate synthetase 1           |
|                    | 728        | 202        | BG372903        | Similar to RNA-binding region (RNP1, RRM)           |
|                    | 632        | 188        | AI102612        | Similar to DAZ associated protein 2; deleted in     |
| <i>Eif2b3</i>      | 1002       | 371        | NM_133609       | eukaryotic translation initiation factor 2B,        |
| <i>Eif5a</i>       | 1295       | 547        | BI283681        | eukaryotic translation initiation factor 5A         |
| <i>Rplp2</i>       | 4873       | 794        | AW919054        | Ribosomal protein, large P2                         |
| <i>Srpr</i>        | 686        | 132        | BM391232        | signal recognition particle receptor ('docking      |
| <i>Drap1</i>       | 380        | 86         | BI296428        | Dr1 associated protein 1 (negative cofactor 2       |
| <i>Eif2s3x</i>     | 202        | 61         | BG662620        | eukaryotic translation initiation factor 2, subunit |
| <i>Eif3s8</i>      | 107        | 29         | AI502930        | eukaryotic translation initiation factor 3, subunit |
| <i>Eif4g1</i>      | 380        | 137        | AI170773        | eukaryotic translation initiation factor 4 gamma,   |
| <i>Rbm9</i>        | 361        | 95         | BE111095        | RNA binding motif protein 9 (predicted)             |
| <i>Rnps1</i>       | 320        | 113        | BG375343        | ribonucleic acid binding protein S1 (predicted)     |
| <i>Sf3b2</i>       | 123        | 53         | BE098910        | splicing factor 3b, subunit 2 (predicted)           |

|                  |     |    |           |                                                 |
|------------------|-----|----|-----------|-------------------------------------------------|
| <i>Tufm</i>      | 183 | 19 | AI763950  | Tu translation elongation factor, mitochondrial |
| <i>U2af114</i>   | 235 | 47 | BM391897  | U2 small nuclear RNA auxiliary factor 1-like 4  |
| <i>Snurf</i>     | 316 | 62 | NM_130738 | small nuclear ribonucleoprotein-associated      |
| <i>LOC292030</i> | 440 | 46 | AI176503  | similar to snRNP core protein SMX5d             |
| ---              | 249 | 51 | BF414649  | Mitochondrial ribosomal protein L52 (predicted) |

#### Transcription

| Common                   | Control    | AMH         | Genbank         | Description                                            |
|--------------------------|------------|-------------|-----------------|--------------------------------------------------------|
| <b><i>RGD1306721</i></b> | <b>172</b> | <b>350</b>  | <b>BI274548</b> | <b>similar to helicase-like protein NHL isoform</b>    |
| <b><i>Zfp191</i></b>     | <b>167</b> | <b>297</b>  | <b>BF284504</b> | <b>zinc finger protein 191</b>                         |
| <b><i>c-fos</i></b>      | <b>120</b> | <b>369</b>  | <b>BF415939</b> | <b>c-fos oncogene</b>                                  |
| <b><i>Foxd4</i></b>      | <b>53</b>  | <b>124</b>  | <b>AA799832</b> | <b>forkhead box D4</b>                                 |
| <b><i>Irf3</i></b>       | <b>236</b> | <b>542</b>  | <b>AA893384</b> | <b>interferon regulatory factor 3</b>                  |
| <b><i>Irf6</i></b>       | <b>111</b> | <b>241</b>  | <b>BF410603</b> | <b>interferon regulatory factor 6 (predicted)</b>      |
| <b><i>Tcf8</i></b>       | <b>471</b> | <b>1011</b> | <b>BG381660</b> | <b>transcription factor 8</b>                          |
| <b><i>Nfyc</i></b>       | <b>552</b> | <b>934</b>  | <b>BI296061</b> | <b>nuclear transcription factor-Y gamma</b>            |
| <b><i>Sox15</i></b>      | <b>404</b> | <b>443</b>  | <b>AI009685</b> | <b>SRY-box containing gene 15 (predicted)</b>          |
| <b><i>Tle2</i></b>       | <b>42</b>  | <b>110</b>  | <b>AI175907</b> | <b>transducin-like enhancer of split 2, homolog of</b> |
| ---                      | 140        | 45          | AI178375        | Zinc finger protein 212 (predicted)                    |
| <i>RGD:1303139</i>       | 200        | 21          | AI059254        | zinc finger protein 313                                |
| <i>H3f3b</i>             | 4013       | 934         | AI177503        | H3 histone, family 3B                                  |
| <i>Tfpt</i>              | 117        | 40          | AB029495        | TCF3 (E2A) fusion partner (in childhood                |
|                          | 128        | 13          | BE115519        | Similar to sox-4 protein - mouse (LOC364712),          |
|                          | 891        | 224         | AI137136        | Similar to ASF1 anti-silencing function 1              |
| <i>Nfkbia</i>            | 897        | 139         | AW672589        | nuclear factor of kappa light chain gene               |
| <i>Cited2</i>            | 346        | 96          | NM_053698       | Cbp/p300-interacting transactivator, with              |
| <i>Gata4</i>             | 471        | 244         | L22761          | GATA binding protein 4                                 |
| <i>Tsnax</i>             | 173        | 50          | AF262357        | translin-associated factor X                           |
| <i>Rnf4</i>              | 284        | 112         | AY050655        | ring finger protein 4                                  |
| <i>Znf292</i>            | 336        | 131         | BF388585        | Similar to zinc-finger protein (LOC313144),            |
| <i>Asb15</i>             | 239        | 70          | AI706673        | ankyrin repeat and SOCS box-containing                 |
| <i>Ath55</i>             | 130        | 39          | AF277899        | adapter protein ATH-55                                 |
| <i>Btg2</i>              | 122        | 25          | BI288701        | B-cell translocation gene 2, anti-proliferative        |
| <i>Gtf2i</i>             | 187        | 73          | AI715835        | general transcription factor II I                      |
| <i>Hdac1</i>             | 289        | 47          | AI180339        | histone deacetylase 1                                  |
| <i>Ighmbp2</i>           | 101        | 33          | NM_031586       | immunoglobulin mu binding protein 2                    |
| <i>Scand1</i>            | 270        | 47          | BM386654        | SCAN domain-containing 1 (predicted)                   |
| <i>Btf3</i>              | 3300       | 1089        | BG666659        | basic transcription factor 3 (predicted)               |
| <i>Cbx1</i>              | 274        | 56          | BF389675        | chromobox homolog 1 (Drosophila HP1 beta)              |
| <i>Dnajb1</i>            | 397        | 164         | BM384926        | DnaJ (Hsp40) homolog, subfamily B, member              |
| <i>Foxo1a</i>            | 210        | 30          | BI295511        | forkhead box O1A                                       |
| <i>Hnrpa2b1</i>          | 502        | 59          | BG666358        | heterogeneous nuclear ribonucleoprotein                |
| <i>Hsp105</i>            | 305        | 80          | BF525282        | heat shock protein 105 (predicted)                     |
| <i>Madh5</i>             | 111        | 18          | BE111416        | SMAD, mothers against DPP homolog 5                    |
| <i>Mxd4</i>              | 191        | 35          | BI274201        | Max dimerization protein 4 (predicted)                 |
| <i>Tceal8</i>            | 552        | 210         | AI230334        | transcription elongation factor A (SII)-like 8         |
| <i>TCEB2</i>             | 1631       | 659         | NM_031129       | transcription elongation factor B (SIII)               |
| <i>Tcf4</i>              | 421        | 179         | NM_053369       | transcription factor 4                                 |
| <i>Nfix</i>              | 218        | 81          | BF420722        | nuclear factor I/X                                     |
| <i>Nono</i>              | 540        | 257         | BF555394        | non-POU domain containing, octamer-binding             |
| <i>Nucb</i>              | 372        | 122         | Z36277          | nucleobindin                                           |
| <i>Peg3</i>              | 225        | 87          | BE104676        | paternally expressed 3 (predicted)                     |
| <i>Phb</i>               | 997        | 278         | BI282863        | prohibitin                                             |
| <i>Pold2</i>             | 405        | 177         | AI102751        | polymerase (DNA directed), delta 2, regulatory         |
| <i>Polr2i</i>            | 625        | 148         | BG373075        | polymerase (RNA) II (DNA directed)                     |



|                  |     |     |           |                                                  |
|------------------|-----|-----|-----------|--------------------------------------------------|
| <i>Polr2j</i>    | 703 | 220 | AW530341  | polymerase (RNA) II (DNA directed)               |
| <i>Recc1</i>     | 666 | 240 | BM391856  | replication factor C                             |
| <i>Rfc3</i>      | 503 | 161 | AI103093  | replication factor C (activator 1) 3 (predicted) |
| <i>Sin3a</i>     | 159 | 35  | BE116983  | transcriptional regulator, SIN3A (yeast)         |
| <i>Sirt6</i>     | 191 | 102 | AW525725  | sirtuin 6 (silent mating type information)       |
| <i>Smarca4</i>   | 205 | 88  | BE111847  | SWI/SNF related, matrix associated, actin        |
| <i>Sqstm1</i>    | 682 | 253 | BG663093  | sequestosome 1                                   |
| <i>Thrap6</i>    | 200 | 46  | AI008698  | thyroid hormone receptor associated protein 6    |
| <i>Usf1</i>      | 193 | 62  | NM_031777 | upstream transcription factor 1                  |
| <i>LOC362085</i> | 234 | 56  | AI548388  | similar to helix-loop-helix protein NOHLH        |
| ---              | 167 | 73  | AI710341  | Zinc finger protein 316 (predicted)              |

#### Misc/Unknown

| Common              | Control    | AMH        | Genbank         | Description                                    |
|---------------------|------------|------------|-----------------|------------------------------------------------|
|                     | <b>118</b> | <b>194</b> | <b>BG670294</b> | <b>Transcribed sequence with moderate</b>      |
| <b><i>Fbxw9</i></b> | <b>78</b>  | <b>171</b> | <b>AI407555</b> | <b>F-box and WD-40 domain protein 9</b>        |
| <i>Mta1</i>         | 143        | 49         | AJ132046        | metastasis associated 1                        |
| <i>Sp17</i>         | 221        | 49         | NM_053482       | sperm autoantigenic protein 17                 |
| <i>Mki67ip</i>      | 228        | 25         | BG667615        | spermatogenesis-related protein (Srp)          |
| <i>Abi1</i>         | 417        | 111        | NM_024397       | eps8 binding protein (e3B1), alternatively     |
| <i>Cdtw1</i>        | 499        | 94         | NM_134395       | P11 protein                                    |
| <i>Cln3</i>         | 357        | 97         | BI285912        | Cln3p                                          |
| <i>Fau</i>          | 5341       | 1530       | AI177362        | Finkel-Biskis-Reilly murine sarcoma            |
| <i>Mox2</i>         | 223        | 87         | AA924563        | Antigen identified by monoclonal antibody      |
| <i>Nipsnap1</i>     | 327        | 40         | BI289807        | 4-nitrophenylphosphatase domain and non-       |
| <i>P34</i>          | 114        | 33         | NM_134398       | p34 protein                                    |
| <i>Prcc</i>         | 152        | 45         | BG669807        | papillary renal cell carcinoma (translocation- |
| <i>Ptcd2</i>        | 167        | 73         | BM386015        | pentatricopeptide repeat domain 2 (predicted)  |
| <i>Scoc</i>         | 111        | 38         | AI029749        | short coiled-coil protein (predicted)          |
| <i>Sdbcag84</i>     | 602        | 199        | AI228649        | serologically defined breast cancer antigen 84 |
| <i>Torid</i>        | 1166       | 248        | NM_134390       | TORID                                          |
| <i>Tssc4</i>        | 169        | 79         | BI282086        | tumor-suppressing subchromosomal               |
| <i>Vof16</i>        | 247        | 67         | BE107282        | ischemia related factor vof-16                 |

#### ESTs

| Common               | Control | AMH | Genbank  | Description                                                |
|----------------------|---------|-----|----------|------------------------------------------------------------|
| <i>LOC286991</i>     | 48      | 71  | AF057564 | <b>Rattus norvegicus putative retrovirus-</b>              |
| <i>LOC292486</i>     | 87      | 165 | BI290029 | <b>similar to Aig1 protein</b>                             |
| <i>LOC294948</i>     | 226     | 294 | BI295562 | <b>similar to armadillo repeat-containing</b>              |
| <i>LOC295457</i>     | 263     | 483 | AI229905 | <b>similar to RIKEN cDNA 1500009M05</b>                    |
| <i>LOC297504</i>     | 56      | 149 | AI556447 | <b>similar to mKIAA0212 protein</b>                        |
| <i>LOC300284</i>     | 506     | 647 | AI145871 | <b>similar to RIKEN cDNA 4833435D08 /// similar to</b>     |
| <i>LOC310877</i>     | 94      | 225 | BM384466 | <b>TRAF2 binding protein</b>                               |
| <i>LOC314997</i>     | 78      | 184 | BE097018 | <b>similar to mKIAA0493 protein</b>                        |
| <i>LOC317181</i>     | 110     | 410 | AA818334 | <b>similar to Sushi-repeat containing protein</b>          |
| <i>LOC361110</i>     | 373     | 498 | AA945898 | <b>hypothetical protein</b>                                |
| <i>LOC363306 ///</i> | 101     | 273 | AI412781 | <b>hypothetical protein LOC363306 /// similar to RIKEN</b> |
| <i>LOC363495</i>     | 130     | 342 | AA944562 | <b>similar to AI448196 protein</b>                         |
| <i>LOC498087</i>     | 13      | 88  | BF415134 | <b>similar to stefin A2</b>                                |
| <i>LOC498362</i>     | 95      | 219 | AA818153 | <b>LOC498362</b>                                           |
| <i>LOC498703</i>     | 104     | 216 | BI277805 | <b>similar to mKIAA1931 protein</b>                        |
| <i>LOC499055</i>     | 84      | 201 | AA964600 | <b>similar to chromosome 6 open reading</b>                |
| <i>LOC500671</i>     | 235     | 521 | AI102249 | <b>similar to chromosome 14 open reading</b>               |
| <i>MGC94262</i>      | 265     | 569 | BF283704 | <b>Similar to RIKEN cDNA 2010200I23</b>                    |

|                    |      |      |          |                                              |
|--------------------|------|------|----------|----------------------------------------------|
| <i>MGC94555</i>    | 96   | 228  | BF397529 | intimal thickness-related receptor           |
| <i>MGC94686</i>    | 971  | 1175 | BF285068 | similar to RIKEN cDNA 2810413N20             |
| <i>RGD:1303214</i> | 128  | 343  | AI410096 | similar to 2310044H10Rik protein             |
| <i>RGD1305288</i>  | 244  | 576  | AI010721 | similar to chromosome 14 open reading        |
| <i>RGD1307449</i>  | 222  | 303  | AA850714 | similar to RIKEN cDNA 4930429M06Rik          |
| <i>RGD1307752</i>  | 1009 | 1924 | AI409756 | similar to RIKEN cDNA 1110008F13             |
| <i>RGD1309615</i>  | 98   | 113  | AI058976 | similar to uroplakin IIIb (predicted)        |
| <i>RGD1309779</i>  | 364  | 839  | BF547020 | similar to ENSANGP00000021391                |
| <i>RGD1309957</i>  | 54   | 70   | BM391844 | similar to Hypothetical WD-repeat protein    |
| <i>RGD1311166</i>  | 74   | 145  | AA997097 | similar to RIKEN cDNA 2810417J12 gene        |
| ---                | 165  | 369  | BI277433 | Transcribed locus, moderately similar to     |
| ---                | 201  | 448  | BI303641 | Similar to dJ862K6.2.2 (splicing factor,     |
| ---                | 69   | 213  | BM389061 | Transcribed locus                            |
| ---                | 184  | 226  | H31887   | Similar to RIKEN cDNA 1700037H04             |
| ---                | 149  | 315  | AI579645 | Transcribed locus                            |
| ---                | 162  | 336  | AI009334 | ADP-ribosylhydrolase like 2 (predicted)      |
| ---                | 53   | 110  | AI228076 | Transcribed locus                            |
| ---                | 295  | 635  | AI031032 | Transcribed locus, weakly similar to         |
| ---                | 180  | 433  | BM382988 | Transcribed locus                            |
| ---                | 73   | 162  | AI233709 | Transcribed locus                            |
| ---                | 90   | 117  | BF393881 | ---                                          |
| ---                | 3336 | 4409 | AI710284 | ---                                          |
| ---                | 111  | 250  | BF416285 | Transcribed locus                            |
| ---                | 46   | 95   | BF419655 | ---                                          |
| ---                | 95   | 241  | AI102061 | CDNA clone IMAGE:7313785                     |
| ---                | 31   | 47   | BF409997 | Transcribed locus                            |
| ---                | 47   | 77   | BI300335 | ---                                          |
| ---                | 81   | 221  | AI598976 | Transcribed locus                            |
| ---                | 302  | 435  | BF396950 | ---                                          |
| ---                | 52   | 106  | AI501237 | ---                                          |
| ---                | 550  | 1120 | BE110241 | ---                                          |
| ---                | 125  | 321  | BI294763 | ---                                          |
| ---                | 69   | 97   | BI284837 | Transcribed locus                            |
| ---                | 94   | 288  | BE102740 | Similar to A830059I20Rik protein             |
| ---                | 83   | 171  | BI275261 | ---                                          |
| ---                | 46   | 131  | BE116018 | Transcribed locus, strongly similar to       |
| ---                | 108  | 249  | AW523502 | ---                                          |
| ---                | 71   | 176  | BM389322 | Transcribed locus                            |
| ---                | 37   | 129  | AI072678 | ---                                          |
| ---                | 53   | 112  | BE098785 | Transcribed locus, moderately similar to     |
| ---                | 147  | 280  | AW536039 | ---                                          |
| ---                | 27   | 178  | AI576907 | ---                                          |
| ---                | 128  | 364  | AI412335 | Cytotoxic granule-associated RNA binding     |
| ---                | 92   | 236  | BM385955 | Transcribed locus                            |
| ---                | 483  | 643  | AI059054 | ---                                          |
| ---                | 85   | 96   | AI071877 | Transcribed locus                            |
| ---                | 97   | 241  | BE105150 | ---                                          |
| ---                | 129  | 162  | BE102803 | Eukaryotic translation initiation factor 5A2 |
| ---                | 38   | 111  | AI070651 | Transcribed locus                            |
| ---                | 57   | 186  | BI273721 | Transcribed locus                            |
| ---                | 85   | 173  | AI043947 | ---                                          |
| ---                | 95   | 214  | AI576469 | Transcribed locus                            |
| ---                | 101  | 163  | AI715326 | ---                                          |
| ---                | 192  | 246  | AI715121 | Similar to RB-associated KRAB repressor      |
| ---                | 87   | 147  | AI071210 | ---                                          |
| <i>AW522302</i>    | 56   | 62   | ---      | CDNA clone MGC:95146 IMAGE:7129361           |

|           |      |      |          |                                                  |
|-----------|------|------|----------|--------------------------------------------------|
| ---       | 63   | 132  | AW522166 | Transcribed locus                                |
| ---       | 37   | 84   | AI170755 | Transcribed locus, strongly similar to           |
| ---       | 130  | 284  | BI289475 | ---                                              |
| ---       | 70   | 168  | BF283381 | Transcribed locus                                |
| ---       | 103  | 206  | AA799676 | ---                                              |
| ---       | 29   | 114  | BF399329 | ---                                              |
| ---       | 1265 | 1575 | BI303277 | ---                                              |
| ---       | 114  | 261  | BG371591 | Transcribed locus                                |
| ---       | 70   | 177  | AI029637 | Transcribed locus                                |
| ---       | 94   | 189  | BI292315 | Transcribed locus                                |
| ---       | 64   | 185  | BE110640 | Transcribed locus                                |
| ---       | 36   | 63   | AI146247 | Transcribed locus                                |
| ---       | 34   | 110  | AA957929 | ---                                              |
| ---       | 83   | 254  | BI277836 | ---                                              |
| ---       | 37   | 38   | AW523958 | Transcribed locus                                |
| ---       | 53   | 120  | AI228600 | Transcribed locus, moderately similar to         |
| ---       | 99   | 174  | AI179766 | ---                                              |
| ---       | 47   | 66   | BF412220 | ---                                              |
| ---       | 46   | 110  | H34760   | Transcribed locus                                |
| ---       | 100  | 176  | BI282914 | ---                                              |
| ---       | 73   | 145  | BG380184 | ---                                              |
| ---       | 46   | 122  | AI548369 | ---                                              |
| ---       | 48   | 142  | BE108093 | Transcribed locus                                |
| ---       | 201  | 430  | BE098186 | ---                                              |
| ---       | 124  | 157  | BI275309 | Transcribed locus                                |
| ---       | 31   | 49   | AA893160 | ---                                              |
| ---       | 59   | 172  | BE103179 | Transcribed locus                                |
| ---       | 52   | 57   | AI071102 | Transcribed locus                                |
| ---       | 122  | 42   | AW525690 | Similar to RIKEN cDNA 4930584N22                 |
| LOC288913 | 503  | 107  | X62277   | similar to LEYDIG CELL TUMOR 10 KD               |
| LOC288913 | 208  | 86   | BI279696 | similar to LEYDIG CELL TUMOR 10 KD               |
| LOC288925 | 518  | 139  | AI599071 | similar to cDNA sequence BC056474                |
| LOC289471 | 432  | 167  | AA964538 | similar to Hel308 protein                        |
| LOC290877 | 302  | 90   | BM383043 | similar to hypothetical protein MGC20579         |
| LOC292588 | 544  | 133  | BI279788 | similar to Ubiquitin-conjugating enzyme E2S      |
| LOC293863 | 490  | 122  | BI274583 | similar to Eso3 protein                          |
| LOC298684 | 594  | 164  | AI599839 | similar to Mrpl20 protein                        |
| LOC300027 | 104  | 58   | BI278547 | similar to high density lipoprotein-binding      |
| LOC301123 | 632  | 182  | AA818971 | Similar to RE70703p-like protein                 |
| LOC301124 | 839  | 349  | AA849634 | similar to QIL1                                  |
| LOC304809 | 409  | 154  | BM383996 | similar to PLU1                                  |
| LOC305350 | 154  | 75   | H33102   | similar to Mitochondrial carrier triple repeat 1 |
| LOC306254 | 335  | 115  | AW532414 | similar to polybromo-1                           |
| LOC307029 | 225  | 48   | BG665671 | similar to WAC                                   |
| LOC314162 | 106  | 19   | AA900261 | similar to C330016H24Rik protein /// similar to  |
| LOC360494 | 141  | 44   | BG673166 | similar to RIKEN cDNA 0610007P22                 |
| LOC360810 | 238  | 45   | BE106064 | similar to RIKEN cDNA A930018B01                 |
| LOC361128 | 162  | 59   | BI284988 | similar to TR4 orphan receptor associated        |
| LOC362304 | 454  | 100  | BI296681 | similar to ORC5-related protein                  |
| LOC362626 | 135  | 6    | BE096504 | similar to hypothetical protein dJ465N24.2.1     |
| LOC362934 | 2163 | 694  | AI233210 | similar to lymphocyte antigen 6 complex, locus   |
| LOC363190 | 179  | 46   | BM388658 | similar to Ubr2 protein                          |
| LOC363289 | 791  | 234  | BI293662 | similar to RIKEN cDNA 1810059A23                 |
| LOC365361 | 177  | 70   | AI410415 | similar to RIKEN cDNA 4930404J24                 |
| LOC497920 | 479  | 105  | AI105202 | LOC497920                                        |
| LOC498030 | 569  | 236  | AI172459 | similar to anaphase promoting complex            |

|                    |      |      |          |                                                  |
|--------------------|------|------|----------|--------------------------------------------------|
| <i>LOC498824</i>   | 426  | 104  | AI170561 | similar to WAC                                   |
| <i>LOC498964</i>   | 233  | 69   | AA998459 | similar to SPIRE2 protein                        |
| <i>LOC498989</i>   | 3913 | 1562 | BG664827 | similar to Ab2-143                               |
| <i>LOC499318</i>   | 1038 | 185  | BM388445 | <i>LOC499318</i>                                 |
| <i>LOC499391</i>   | 306  | 66   | BM384085 | similar to gem (nuclear organelle) associated    |
| <i>LOC499428</i>   | 188  | 58   | AI716904 | <i>LOC499428</i>                                 |
| <i>LOC499567</i>   | 596  | 280  | BI280802 | <i>LOC499567</i>                                 |
| <i>LOC499780</i>   | 118  | 20   | BG669070 | similar to Hypothetical UPF0184 protein          |
| <i>LOC500555</i>   | 98   | 22   | BM387829 | similar to PS1D protein                          |
| <i>LOC500575</i>   | 243  | 66   | AI408842 | similar to DNA segment, Chr 4, ERATO Doi         |
| <i>LOC500855</i>   | 527  | 192  | BF289183 | hypothetical protein <i>LOC500855</i>            |
| <i>LOC500993</i>   | 106  | 27   | BI290002 | similar to hypothetical protein FLJ20010         |
| <i>LOC501702</i>   | 1127 | 409  | AW917547 | similar to Prr6 protein                          |
| <i>MGC72638</i>    | 733  | 267  | AI412117 | Unknown (protein for <i>MGC:72638</i> )          |
| <i>MGC72942</i>    | 1694 | 262  | AA944393 | Similar to CG6105-PA ( <i>LOC300677</i> ), mRNA  |
| <i>MGC93766</i>    | 108  | 20   | BF409560 | similar to RIKEN cDNA 1810013B01                 |
| <i>MGC94600</i>    | 257  | 69   | AI454858 | scotin                                           |
| <i>MGC94720</i>    | 144  | 14   | AW533685 | similar to hypothetical protein <i>MGC2574</i>   |
| <i>MGC94752</i>    | 576  | 182  | BF397012 | similar to RIKEN cDNA 2600001P13                 |
| <i>RGD:1302952</i> | 1143 | 200  | BG669198 | COP9 signalosome subunit 4                       |
| <i>RGD:1302994</i> | 202  | 26   | BI296168 | proliferation-associated 2G4, 38kDa              |
| <i>RGD:1303002</i> | 256  | 49   | BF282468 | COP9 constitutive photomorphogenic homolog       |
| <i>RGD:1303117</i> | 129  | 52   | BF405050 | hypothetical <i>LOC292764</i>                    |
| <i>RGD1304576</i>  | 265  | 142  | BG380336 | similar to Hypothetical protein <i>MGC25614</i>  |
| <i>RGD1304593</i>  | 88   | 46   | BE111839 | similar to expressed sequence C77668             |
| <i>RGD1304977</i>  | 162  | 52   | BE111736 | similar to mKIAA0023 protein (predicted)         |
| <i>RGD1305133</i>  | 652  | 165  | BE116128 | similar to Ab2-008 (predicted)                   |
| <i>RGD1305492</i>  | 438  | 89   | BG670404 | similar to RIKEN cDNA 1700034P14 (predicted)     |
| <i>RGD1305695</i>  | 210  | 64   | BF417956 | similar to RIKEN cDNA 2700023B17 (predicted)     |
| <i>RGD1305713</i>  | 144  | 48   | BI288945 | similar to RIKEN cDNA 3110040N11 (predicted)     |
| <i>RGD1305781</i>  | 116  | 35   | BI278874 | similar to mKIAA0431 protein (predicted)         |
| <i>RGD1306067</i>  | 168  | 54   | BF522436 | similar to chromosome 20 open reading frame 6    |
| <i>RGD1306103</i>  | 174  | 68   | BE102146 | similar to RIKEN cDNA 2610017G09 (predicted)     |
| <i>RGD1306288</i>  | 122  | 23   | BF284879 | similar to hypothetical protein FLJ14360         |
| <i>RGD1306377</i>  | 195  | 44   | BI288146 | similar to prostate cancer antigen-1 (predicted) |
| <i>RGD1306495</i>  | 163  | 42   | AW144176 | similar to EST AA792894 (predicted)              |
| <i>RGD1306583</i>  | 254  | 51   | AA819224 | similar to RIKEN cDNA 2410002O22 gene            |
| <i>RGD1307423</i>  | 568  | 143  | H31931   | similar to RIKEN cDNA 1810014L12 (predicted)     |
| <i>RGD1307479</i>  | 116  | 41   | BG372657 | similar to KIAA1521 protein (predicted)          |
| <i>RGD1307791</i>  | 209  | 21   | BF407856 | similar to hypothetical protein FLJ10342         |
| <i>RGD1308082</i>  | 309  | 115  | BI279855 | similar to px19-like protein (predicted)         |
| <i>RGD1308134</i>  | 335  | 119  | BM390489 | similar to RIKEN cDNA 1110020A23 (predicted)     |
| <i>RGD1308331</i>  | 144  | 69   | BI294789 | similar to Trithorax homolog 2 (Mixed lineage)   |
| <i>RGD1308383</i>  | 429  | 165  | AI232948 | similar to 2900070E19Rik protein (predicted)     |
| <i>RGD1308635</i>  | 185  | 30   | BG379301 | similar to CG12379-PA (predicted)                |
| <i>RGD1308696</i>  | 158  | 50   | BF400209 | similar to hypothetical protein D11Ert497e       |
| <i>RGD1308750</i>  | 146  | 51   | BM387790 | similar to DNA segment, Chr 19, Brigham &        |
| <i>RGD1308772</i>  | 130  | 35   | BF552813 | similar to KIAA0564 protein (predicted)          |
| <i>RGD1308795</i>  | 289  | 93   | AW143311 | similar to hypothetical protein FLJ12994         |
| <i>RGD1309025</i>  | 248  | 47   | AI102954 | similar to hypothetical protein FLJ20003         |
| <i>RGD1309054</i>  | 256  | 80   | AI231159 | similar to FKSG26 protein (predicted)            |
| <i>RGD1309199</i>  | 390  | 53   | AI101392 | similar to CBF1 interacting corepressor          |
| <i>RGD1309319</i>  | 211  | 41   | BF416979 | similar to SPRY domain-containing SOCS box       |
| <i>RGD1309550</i>  | 167  | 74   | BI295047 | similar to hypothetical protein D12Ert771e       |
| <i>RGD1309691</i>  | 655  | 111  | AA894259 | similar to RIKEN cDNA 2010110M21 (predicted)     |
| <i>RGD1309735</i>  | 346  | 78   | BI278208 | similar to CG14977-PA (predicted)                |

|                   |      |     |          |                                                                     |
|-------------------|------|-----|----------|---------------------------------------------------------------------|
| <i>RGD1309986</i> | 104  | 27  | AI236185 | similar to CG9135-PA (predicted)                                    |
| <i>RGD1309986</i> | 107  | 27  | AA848942 | similar to CG9135-PA (predicted)                                    |
| <i>RGD1310643</i> | 119  | 31  | BF560281 | similar to HEF-like protein (predicted)                             |
| <i>RGD1310660</i> | 243  | 60  | AI406304 | similar to RIKEN cDNA 2700038C09                                    |
| <i>RGD1310810</i> | 268  | 90  | BG377386 | similar to RIKEN cDNA 4930444A02 (predicted)                        |
| <i>RGD1310861</i> | 318  | 100 | BM386571 | similar to RIKEN cDNA 1500011H22                                    |
| <i>RGD1310922</i> | 130  | 26  | H34199   | similar to chromosome 16 open reading frame                         |
| <i>RGD1311016</i> | 131  | 39  | C06752   | similar to RIKEN cDNA 9130427A09 (predicted)                        |
| <i>RGD1311409</i> | 244  | 101 | BF399333 | similar to B430201G11Rik protein (predicted)                        |
| <i>RGD1311463</i> | 145  | 37  | AW526652 | similar to RIKEN cDNA 2700007P21 (predicted)                        |
| <i>RGD1311622</i> | 164  | 76  | BI287209 | similar to RIKEN cDNA 1110063F24 (predicted)                        |
| <i>RGD1311813</i> | 275  | 42  | AW528213 | similar to RIKEN cDNA 2610020H15                                    |
| ---               | 241  | 113 | BE110614 | Transcribed locus                                                   |
| ---               | 977  | 331 | AA799526 | ---                                                                 |
| ---               | 930  | 192 | BG374451 | ---                                                                 |
| ---               | 303  | 127 | BE117558 | Transcribed locus                                                   |
| ---               | 110  | 38  | AI227832 | ---                                                                 |
| ---               | 270  | 75  | AI235284 | Transcribed locus, weakly similar to                                |
| ---               | 298  | 84  | BF554893 | ---                                                                 |
| ---               | 255  | 84  | AA800232 | Transcribed locus, strongly similar to                              |
| ---               | 625  | 237 | BM389079 | Transcribed locus                                                   |
| ---               | 584  | 103 | AA800242 | ---                                                                 |
| ---               | 258  | 78  | BI283851 | ---                                                                 |
| ---               | 295  | 106 | BG376761 | ---                                                                 |
| ---               | 121  | 53  | AI102576 | Transcribed locus                                                   |
| ---               | 197  | 66  | AI237047 | CDNA clone IMAGE:7365681                                            |
| ---               | 317  | 47  | AI045904 | ---                                                                 |
| ---               | 165  | 30  | AA850698 | Similar to RIKEN cDNA 4921526F01 gene                               |
| ---               | 290  | 73  | BG376309 | Similar to 5330440M15Rik protein                                    |
| ---               | 361  | 96  | AW531530 | Transcribed locus                                                   |
| ---               | 304  | 141 | AI230320 | Transcribed locus                                                   |
| ---               | 1787 | 710 | AI228978 | LRRGT00193                                                          |
| ---               | 459  | 155 | AI406842 | ---                                                                 |
| ---               | 584  | 169 | AW919569 | ---                                                                 |
| ---               | 1932 | 571 | AI103917 | ---                                                                 |
| ---               | 183  | 43  | BF408438 | Transcribed locus                                                   |
| ---               | 175  | 53  | AI385171 | Transcribed locus, strongly similar to                              |
| ---               | 988  | 265 | BM384701 | ---                                                                 |
| ---               | 150  | 45  | BF409812 | Transcribed locus                                                   |
| ---               | 117  | 39  | AI070593 | Origin recognition complex, subunit 6-like ( <i>S. cerevisiae</i> ) |
| ---               | 96   | 39  | BE113300 | Transcribed locus                                                   |
| ---               | 209  | 72  | BM386385 | Transcribed locus                                                   |
| ---               | 212  | 50  | BI295869 | Transcribed locus                                                   |
| ---               | 305  | 87  | BE104535 | Transcribed locus                                                   |
| ---               | 117  | 43  | BF417096 | ---                                                                 |
| ---               | 262  | 100 | BE115859 | Transcribed locus                                                   |
| ---               | 104  | 11  | BE111879 | ---                                                                 |
| ---               | 906  | 175 | BF396269 | ---                                                                 |
| ---               | 111  | 37  | AI716098 | Transcribed locus                                                   |
| ---               | 116  | 29  | BF396301 | ---                                                                 |
| ---               | 859  | 283 | AW252020 | Similar to hypothetical protein FLJ34512                            |
| ---               | 250  | 90  | AW916148 | Transcribed locus                                                   |
| ---               | 133  | 53  | BE115821 | ---                                                                 |
| ---               | 132  | 52  | AI178542 | Transcribed locus                                                   |
| ---               | 233  | 72  | BE108751 | Transcribed locus, moderately similar to                            |
| ---               | 161  | 59  | AW531791 | Transcribed locus                                                   |

|     |     |     |          |                                              |
|-----|-----|-----|----------|----------------------------------------------|
| --- | 256 | 57  | BI294859 | Similar to CHCHD4 protein                    |
| --- | 133 | 10  | BE110067 | Transcribed locus                            |
| --- | 237 | 93  | AI136740 | Similar to mKIAA0978 protein                 |
| --- | 578 | 169 | AW523199 | ---                                          |
| --- | 117 | 46  | BG664988 | Similar to LanC-like protein 2               |
| --- | 120 | 59  | BI289371 | ---                                          |
| --- | 157 | 64  | BI294693 | ---                                          |
| --- | 323 | 111 | BG377563 | ---                                          |
| --- | 205 | 91  | AI045069 | ---                                          |
| --- | 129 | 34  | BF549788 | COP9 (constitutive photomorphogenic)         |
| --- | 566 | 125 | BI303856 | ---                                          |
| --- | 408 | 152 | BI282024 | ---                                          |
| --- | 211 | 94  | AW434329 | ---                                          |
| --- | 141 | 48  | BM390235 | ---                                          |
| --- | 309 | 108 | BI288731 | ---                                          |
| --- | 167 | 90  | BI283388 | P55 mRNA for p55 protein                     |
| --- | 841 | 159 | AI008409 | LOC499304                                    |
| --- | 117 | 54  | BM390922 | Transcribed locus                            |
| --- | 546 | 113 | AW525862 | ---                                          |
| --- | 298 | 134 | BM389412 | ---                                          |
| --- | 354 | 55  | BF420467 | ---                                          |
| --- | 373 | 141 | AW534352 | Transcribed locus                            |
| --- | 118 | 18  | AI112211 | Transcribed locus                            |
| --- | 488 | 142 | AA956982 | Transcribed locus                            |
| --- | 433 | 128 | BE118116 | Transcribed locus, moderately similar to     |
| --- | 120 | 33  | BI276113 | ---                                          |
| --- | 156 | 75  | BG670858 | Transcribed locus                            |
| --- | 67  | 54  | AI176506 | Necdin-like 2 (predicted)                    |
| --- | 142 | 71  | AW524670 | Similar to 4921517L17Rik protein (predicted) |
| --- | 285 | 53  | AW921279 | ---                                          |
| --- | 38  | 35  | BF404567 | ---                                          |
| --- | 115 | 10  | BE111618 | ---                                          |
| --- | 130 | 56  | BF412429 | Transcribed locus                            |
| --- | 302 | 67  | BF564825 | Transcribed locus                            |
| --- | 117 | 41  | H34328   | ---                                          |
| --- | 111 | 96  | BE101139 | ---                                          |
| --- | 109 | 27  | BI285806 | Transcribed locus                            |
| --- | 208 | 74  | BF398673 | Transcribed locus                            |
| --- | 102 | 27  | AW534457 | ---                                          |
